# Supplementary material for: A Class-Selective Immunoassay for Sulfonamides Residue Detection in Milk Using a Superior Polyclonal Antibody with Broad Specificity and Highly Uniform Affinity
Source: PubMed Central journal article supplement (PMC6384663; doi:10.3390/molecules24030443), 2019-01-26
Supplement: molecules-24-00443-s001.pdf [file molecules-24-00443-s001.pdf]

2 **A Class-Selective Immunoassay for Sulfonamides**  
3 **Residue Detection in Milk using a Superior**  
4 **Polyclonal Antibody with Broad Specificity and**  
5 **Highly Uniform Affinity**

6 **Chenglong Li**<sup>1</sup>, **Xiangshu Luo**<sup>1</sup>, **Yonghan Li**<sup>2</sup>, **Huijuan Yang**<sup>1</sup>, **Xiao Liang**<sup>3</sup>, **Kai Wen**<sup>1</sup>,  
7 **Yanxin Cao**<sup>1</sup>, **Chao Li**<sup>1</sup>, **Weiyu Wang**<sup>1</sup>, **Weimin Shi**<sup>1</sup>, **Suxia Zhang**<sup>1</sup>, **Xuezhi Yu**<sup>1,\*</sup> and  
8 **Zhanhui Wang**<sup>1</sup>

9 <sup>1</sup> Beijing Advanced Innovation Center for Food Nutrition and Human Health, College of Veterinary  
10 Medicine, China Agricultural University, Beijing Key Laboratory of Detection Technology for  
11 Animal-Derived Food Safety, Beijing Laboratory of Food Quality and Safety, 100193 Beijing,  
12 People's Republic of China

13 <sup>2</sup> Henan Animal Health Supervision Institute, 450008 Zhengzhou, People's Republic of China

14 <sup>3</sup> College of Veterinary Medicine, Qingdao Agricultural University, 266109 Qingdao, People's  
15 Republic of China

16 \* Correspondence: yu51422396@126.com; Tel.: +86-10-6273 4565; Fax: +86-10-6273 1032

17

18 **Figure Captions**

19 **Figure S1.**  $^1\text{H}$ -NMR result of hapten SA10-X

20 **Figure S2.**  $^{13}\text{C}$ -NMR result of hapten SA10-X

21

**Table S1.**

Coating antigens selecting result of pAb

| Coating antigens | Coating antigens dilution | pAb dilution | B <sub>0</sub> | B (100 µg L <sup>-1</sup> ) | IC <sub>50</sub> of SMZ (µg L <sup>-1</sup> ) |
|------------------|---------------------------|--------------|----------------|-----------------------------|-----------------------------------------------|
| BS-OVA           | 1:160,000                 | 1:100,000    | 1.950          | 1.067                       | 65.5                                          |
| TS-OVA           | 1:5,000                   | 1:20,000     | 1.749          | 1.188                       | 174.3                                         |
| ST-OVA           | 1:20,000                  | 1:40,000     | 1.304          | 0.886                       | 235.8                                         |
| SA10-X-OVA       | 1:500,000                 | 1:200,000    | 1.596          | 1.538                       | >500                                          |
| SMZ-OVA          | 1:10,000                  | 1:10,000     | 0.245          | NA                          | NA                                            |
| SG-OVA           | 1:10,000                  | 1:10,000     | 0.235          | NA                          | NA                                            |
| HS-OVA           | 1:10,000                  | 1:10,000     | 0.150          | NA                          | NA                                            |
| SA10-OVA         | 1:10,000                  | 1:10,000     | 0.134          | NA                          | NA                                            |

NA, not available

**Table S2.**

IC<sub>50</sub> values (μg L<sup>-1</sup>) of SAs against pAb in this study and other antibodies in literatures

| SAs                                             | Structures                                                                          | pAb    | pAb<br>HS [1] | pAb<br>SAB<br>[2] | pAb<br>SA1-CH <sub>2</sub><br>[3] | 27G3<br>[4] | pAb<br>SA2'<br>[3] | pAb<br>D3<br>[5] | Sulfa-1<br>[6] | 4E10<br>[4] | 3B5B<br>10E3<br>[7] | 4E5<br>[8] | rAb<br>[9] | Chen<br>[10] |
|-------------------------------------------------|-------------------------------------------------------------------------------------|--------|---------------|-------------------|-----------------------------------|-------------|--------------------|------------------|----------------|-------------|---------------------|------------|------------|--------------|
| <b>Single-ring SAs</b>                          |                                                                                     |        |               |                   |                                   |             |                    |                  |                |             |                     |            |            |              |
| SA                                              | 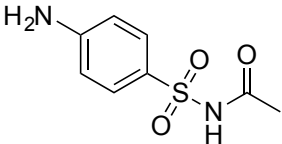   | 10,000 | 10,000        | ND                | 2367                              | 1800        | 452                | ND               | 14,349         | 10,000      | ND                  | 100        | 7.9        | 41.16        |
| SG                                              |    | 127.74 | 8614          | 63                | 1201                              | 500         | 731                | ND               | ND             | 10,000      | ND                  | 100        | 12         | 30.24        |
| SN                                              |    | 2122.4 | 7524          | 108               | 43.5                              | ND          | 19.0               | ND               | 60,000         | ND          | ND                  | 100        | 1800       | 90.18        |
| <b>Two-ring SAs containing a five-atom ring</b> |                                                                                     |        |               |                   |                                   |             |                    |                  |                |             |                     |            |            |              |
| PST                                             |   | 85.69  | 6531          | ND                | ND                                | ND          | ND                 | ND               | ND             | ND          | ND                  | ND         | ND         | 60.16        |
| SIZ                                             |  | 164.53 | 10,000        | ND                | 10,000                            | 250         | 95.6               | 200              | 200,000        | 80          | 350                 | 51         | 0.51       | 35.62        |

|                                                |                                                                                     |       |       |     |      |     |      |      |         |     |    |     |       |       |
|------------------------------------------------|-------------------------------------------------------------------------------------|-------|-------|-----|------|-----|------|------|---------|-----|----|-----|-------|-------|
| SMT                                            | 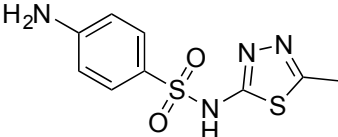   | 3.56  | 113.4 | 399 | 70.3 | 0.6 | 8.8  | 12.8 | 70,000  | 2   | ND | 39  | 0.019 | 0.08  |
| SMX                                            |    | 10.31 | 305.4 | 88  | 255  | 150 | 0.4  | 135  | 60,000  | 30  | 9  | 25  | 0.78  | 0.15  |
| SPA                                            |    | 15.01 | 3024  | ND  | 3098 | ND  | 49.5 | ND   | ND      | ND  | ND | ND  | 0.39  | 28.27 |
| ST                                             |    | 3.71  | ND    | ND  | ND   | ND  | ND   | ND   | ND      | ND  | ND | ND  | ND    | ND    |
| STZ                                            |    | 37.7  | 241.1 | 24  | 12.5 | 10  | 13.7 | 2    | 322     | 130 | 30 | 3.2 | 0.21  | 0.39  |
| SXL                                            |   | 25.51 | 1590  | ND  | ND   | ND  | ND   | 150  | ND      | ND  | ND | ND  | ND    | 29.91 |
| <b>Two-ring SAs containing a six-atom ring</b> |                                                                                     |       |       |     |      |     |      |      |         |     |    |     |       |       |
| SBA                                            |  | 2349  | 111.8 | ND  | ND   | ND  | ND   | ND   | 100,000 | ND  | ND | ND  | ND    | 26.69 |

|      |                                                                                     |        |       |     |      |     |      |     |        |     |     |      |       |       |
|------|-------------------------------------------------------------------------------------|--------|-------|-----|------|-----|------|-----|--------|-----|-----|------|-------|-------|
| SCP  | 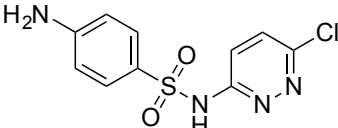   | 9.75   | 786.9 | 23  | 3.8  | 4   | 10.7 | 14  | 4360   | 4   | 20  | 7.3  | 0.072 | 0.39  |
| SDM  |    | 10.34  | 345.8 | 137 | 171  | 250 | 6.1  | 190 | 15,724 | 100 | 100 | 5.3  | 9.9   | 3.45  |
| SDM' |    | 8786.2 | 5105  | ND  | 1731 | 30  | 426  | 31  | ND     | 800 | ND  | 0.52 | 0.32  | ND    |
| SDZ  |    | 37.88  | 1282  | 36  | 18.2 | 80  | 19.5 | 32  | 9763   | 80  | 30  | 0.92 | 0.51  | 4.89  |
| SIM  |    | 6.49   | 1302  | ND  | ND   | ND  | ND   | 1.3 | 3136   | ND  | ND  | 1.9  | ND    | 48.39 |
| SMD  |   | 1.47   | 534.3 | ND  | 6.7  | ND  | 2.7  | 3.2 | ND     | ND  | ND  | 0.76 | ND    | 0.81  |
| SMM  |  | 5.12   | 512.4 | ND  | ND   | ND  | ND   | ND  | ND     | ND  | ND  | 1.1  | 0.62  | 4.51  |
| SMP  |  | 0.92   | 119.5 | 1.6 | 0.6  | 15  | 0.6  | 8.4 | ND     | 13  | ND  | 7.4  | 0.18  | 0.57  |

|     |                                                                                    |       |       |      |      |      |      |     |        |      |      |     |      |       |
|-----|------------------------------------------------------------------------------------|-------|-------|------|------|------|------|-----|--------|------|------|-----|------|-------|
| SMR | 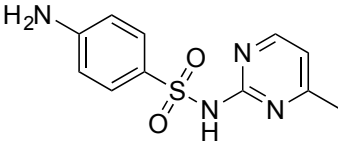  | 11.5  | 1419  | 18.8 | 16.1 | 500  | 36.2 | 19  | 3743   | 250  | 600  | 1.4 | 0.65 | 1.53  |
| SMZ |   | 50.78 | 8337  | 118  | 582  | 8000 | 311  | 130 | 70,000 | 7000 | 1050 | 5.8 | 13   | 18.79 |
| SNT |   | 119.9 | 47.2  | ND   | ND   | ND   | ND   | ND  | 1.41   | ND   | ND   | ND  | 10   | 37.16 |
| SPY |   | 23.68 | 124.4 | ND   | 0.7  | 30   | 0.4  | 10  | 22.8   | 150  | 350  | 100 | 0.26 | 5.09  |
| SQX |   | 12.18 | 1053  | 455  | 4    | 1200 | 1.4  | 90  | 25,000 | 3000 | ND   | 3.8 | 7.1  | 39.12 |
| SSA |  | 15.16 | ND    | ND   | ND   | ND   | ND   | ND  | 4305   | ND   | ND   | ND  | 1100 | 80.05 |

ND, not detected; rAb, recombinant antibody

**Table S3.**

Optimized parameters of indirect competitive ELISA based on pAb using SMZ as reference analyte

| Factors           | Conditions             | B <sub>0</sub> | IC <sub>50</sub><br>( $\mu\text{g L}^{-1}$ ) | B <sub>0</sub> /IC <sub>50</sub> | Factors                  | Conditions    | B <sub>0</sub> | IC <sub>50</sub><br>( $\mu\text{g L}^{-1}$ ) | B <sub>0</sub> /IC <sub>50</sub> |
|-------------------|------------------------|----------------|----------------------------------------------|----------------------------------|--------------------------|---------------|----------------|----------------------------------------------|----------------------------------|
| Coating solutions | <b>CB</b>              | <b>1.342</b>   | <b>60.3</b>                                  | <b>0.0223</b>                    | NaCl (M)                 | 0             | 1.473          | 68.8                                         | 0.0214                           |
|                   | PBS                    | 1.275          | 62.8                                         | 0.0203                           |                          | <b>0.05</b>   | <b>1.337</b>   | <b>50.3</b>                                  | <b>0.0266</b>                    |
|                   | BB                     | 0.2            | NA                                           |                                  |                          | 0.15          | 1.246          | 54.5                                         | 0.0229                           |
| Coating condition | 37°C 2 h               | 1.342          | 60.3                                         | 0.0223                           | 0.3                      | 1.087         | 57.2           | 0.0190                                       |                                  |
|                   | <b>4°C overnight</b>   | <b>1.357</b>   | <b>55.5</b>                                  | <b>0.0245</b>                    | 0.5                      | 0.875         | 61.7           | 0.0142                                       |                                  |
|                   | 37°C 2 h+4°C overnight | 1.477          | 57.2                                         | 0.0258                           |                          |               |                |                                              |                                  |
| Blocking buffer   | <b>5% FBS</b>          | <b>1.349</b>   | <b>51.8</b>                                  | <b>0.0260</b>                    | Tween-20 (%)             | <b>0</b>      | <b>1.373</b>   | <b>51.8</b>                                  | <b>0.0265</b>                    |
|                   | 0.25% casein           | 1.009          | 52.6                                         | 0.0192                           |                          | 0.05          | 1.634          | 63.3                                         | 0.0258                           |
|                   | 5% skimmed milk        | 0.896          | 54.9                                         | 0.0163                           |                          | 0.1           | 1.845          | 74.5                                         | 0.0248                           |
|                   |                        |                |                                              |                                  |                          | 0.5           | 1.833          | 97.2                                         | 0.0189                           |
|                   |                        |                |                                              | 2                                | 1.921                    | 101.5         | 0.0189         |                                              |                                  |
| Blocking time     | 30 min                 | 1.527          | 78.9                                         | 0.0194                           | Competitive time         | 15min         | 0.816          | 62.5                                         | 0.0131                           |
|                   | 1 h                    | 1.435          | 57.3                                         | 0.0250                           |                          | <b>30 min</b> | <b>1.357</b>   | <b>50.4</b>                                  | <b>0.0269</b>                    |
|                   | <b>2 h</b>             | <b>1.314</b>   | <b>53.2</b>                                  | <b>0.0247</b>                    |                          | 45 min        | 1.364          | 53.2                                         | 0.0256                           |
|                   | 4 h                    | 1.266          | 53.5                                         | 0.0237                           |                          | 60 min        | 1.387          | 63.3                                         | 0.0219                           |
| pH                | 5.0                    | 1.079          | 75.3                                         | 0.0143                           | Reaction time of IgG-HRP | 15 min        | 0.735          | 57.2                                         | 0.0128                           |
|                   | 6.0                    | 1.363          | 63.5                                         | 0.0215                           |                          | <b>30 min</b> | <b>1.349</b>   | <b>50.8</b>                                  | <b>0.0266</b>                    |
|                   | <b>7.4</b>             | <b>1.374</b>   | <b>54.2</b>                                  | <b>0.0254</b>                    |                          | 45 min        | 1.577          | 53.7                                         | 0.0294                           |
|                   | 8.0                    | 1.382          | 67.7                                         | 0.0204                           |                          | 60 min        | 1.723          | 55.4                                         | 0.0311                           |
|                   | 9.0                    | 0.977          | 89.2                                         | 0.0110                           |                          |               |                |                                              |                                  |



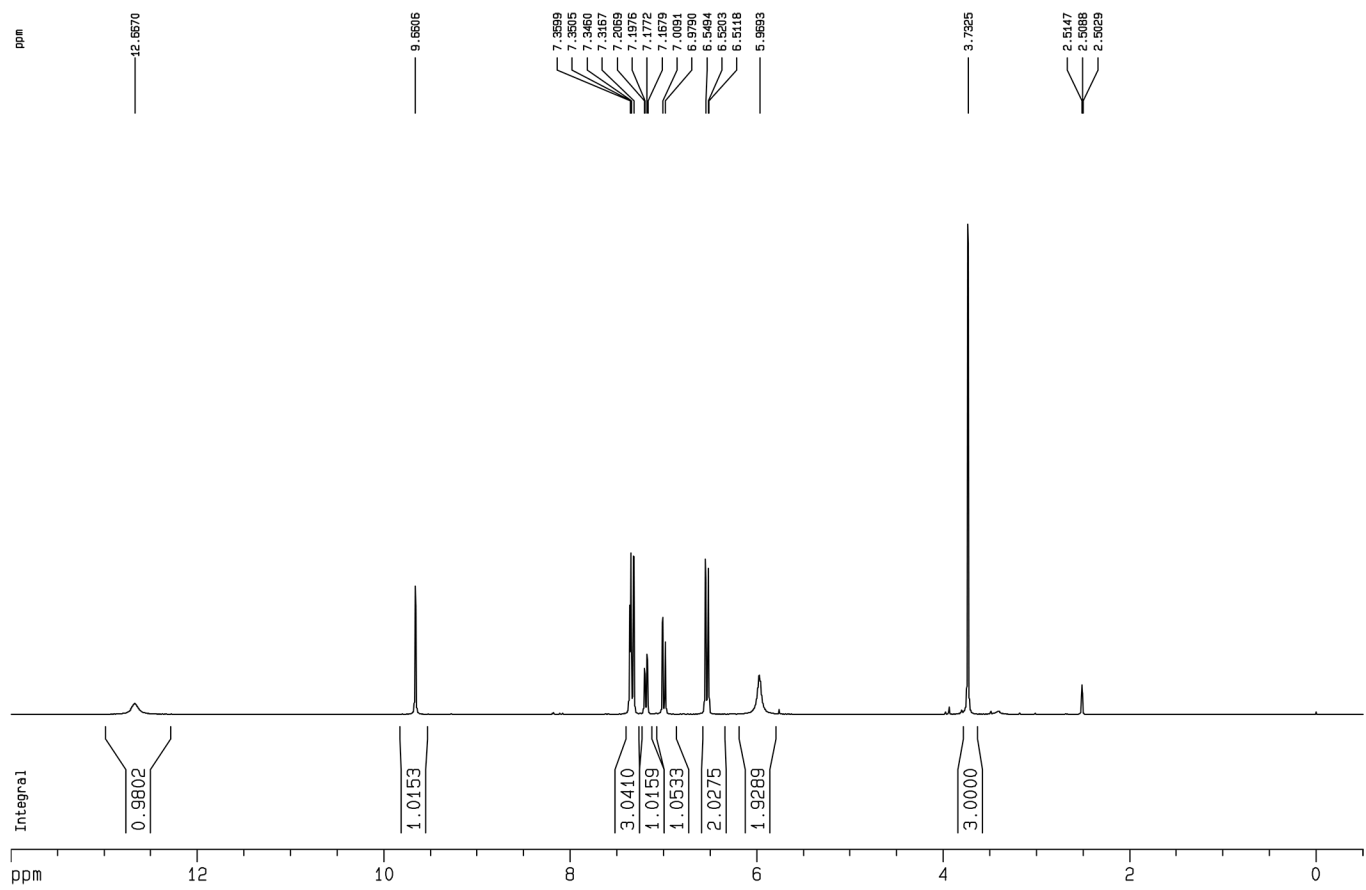

Figure S1.

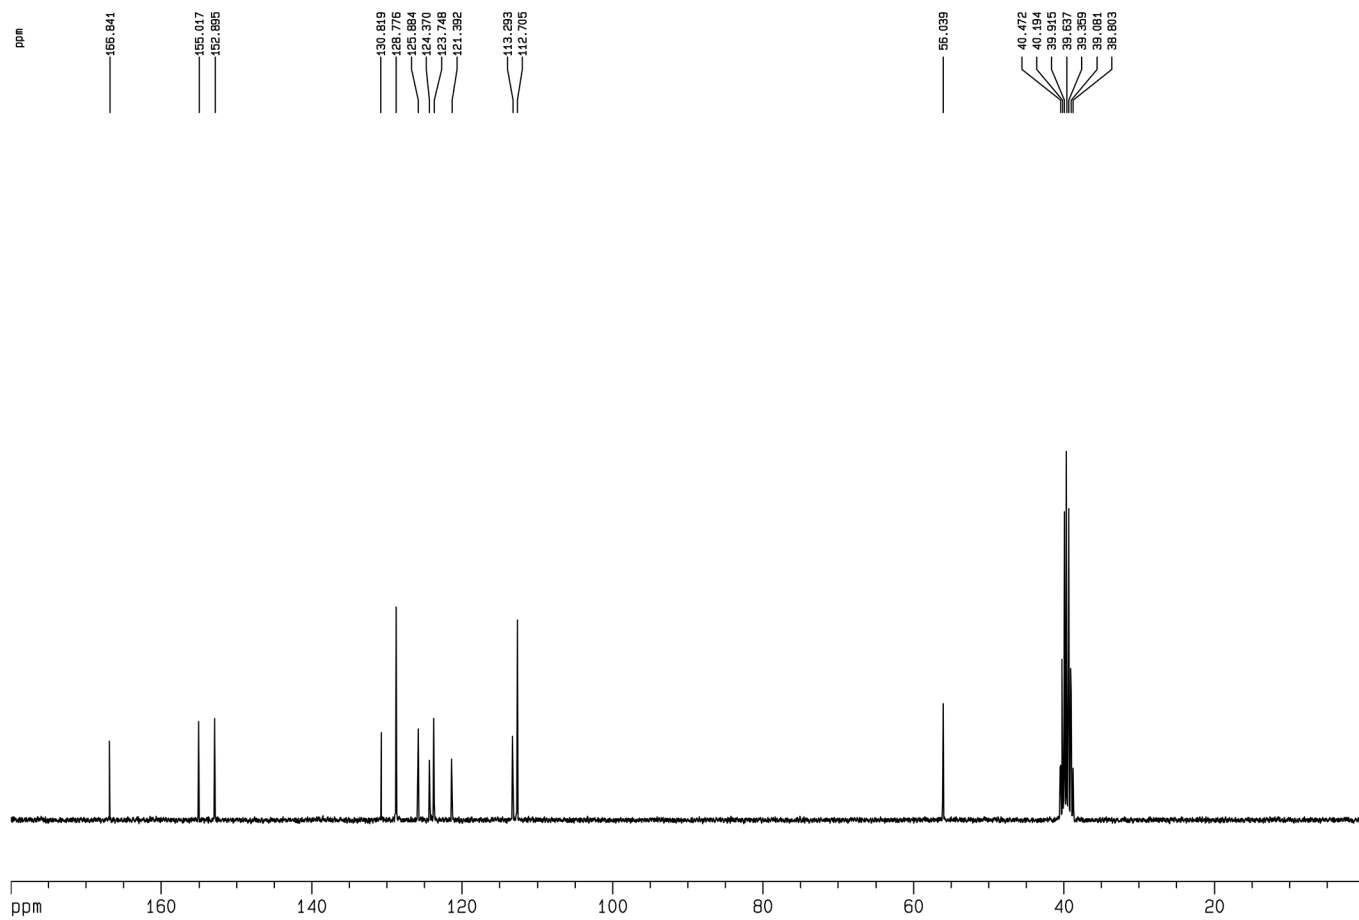

Figure S2.

## References

1. Wang, Z.; Li, Y.; Liang, X.; Zhang, S.; Shi, W.; Shen, J. Forcing immunoassay for sulfonamides to higher sensitivity and broader detection spectrum by site heterologous hapten inducing affinity improvement. *Anal. Methods* **2013**, *5*, 6990–7000. doi: 10.1039/C3AY40864G
2. Ermolenko, D. N.; Eremin, S. A.; Mart'ianov, A. A.; Zherdev, A. V.; Dzantiev, B. B. A new generic enzyme immunoassay for sulfonamides. *Anal. Lett.* **2007**, *40*, 1047–1062. doi: 10.1080/00032710701296945
3. Franek, M.; Diblikova, I.; Cernoch, I.; Vass, M.; Hruska, K. Broad-specificity immunoassays for sulfonamide detection: Immunochemical strategy for generic antibodies and competitors. *Anal. Chem.* **2006**, *78*, 1559–1567. doi: 10.1021/ac0514422
4. Haasnoot, W.; Pre, J. D.; Cazemier, G.; Kemmers-Voncken, A.; Verheijen, R.; Jansen, B. J. M. Monoclonal antibodies against a sulfathiazole derivative for the immunochemical detection of sulfonamides. *Food Agric. Immunol.* **2000**, *12*, 127–138. doi: 10.1080/095401000404076
5. Zhang, H.; Duan, Z.; Wang, L.; Zhang, Y.; Wang, S. Hapten synthesis and development of polyclonal antibody-based multi-sulfonamide immunoassays. *J. Agric. Food Chem.* **2006**, *54*, 4499–4505. doi: 10.1021/jf060868u
6. Muldoon, M. T.; Font, I. A.; Beier, R. C.; Holtzapple, C. K.; Young, C. R.; Stanker, L. H. Development of a cross-reactive monoclonal antibody to sulfonamide antibiotics: Evidence for structural conformation-selective hapten recognition. *Food Agric. Immunol.* **1999**, *11*, 117–134. doi: 10.1080/09540109999807
7. Cliquet, P.; Cox, E.; Haasnoot, W.; Schacht, E.; Goddeeris, B. M. Generation of group-specific antibodies against sulfonamides. *J. Agric. Food Chem.* **2003**, *51*, 5835–5842. doi: 10.1021/jf034316c
8. Zhou, Q.; Peng, D.; Wang, Y.; Pan, Y.; Wan, D.; Zhang, X.; Yuan, Z. A novel hapten and monoclonal-based enzyme-linked immunosorbent assay for sulfonamides in edible animal tissues. *Food Chem.* **2014**, *154*, 52–62. doi: 10.1016/j.foodchem.2014.01.016
9. Korpimäki, T.; Hagren, V.; Brockmann, E.-C.; Tuomola, M. Generic lanthanide fluoroimmunoassay for the simultaneous screening of 18 sulfonamides using an engineered antibody. *Anal. Chem.* **2004**, *76*, 3091–3098. doi: 10.1021/ac049823n
10. Chen, Y.; Liu, L.; Xu, L.; Song, S.; Kuang, H.; Cui, G.; Xu, C. Gold immunochromatographic sensor for the rapid detection of twenty-six sulfonamides in foods. *Nano Res.* **2017**, *10*, 2833–2844. doi: 10.1007/s12274-017-1490-x
